# Supplementary material for: DUSP1 regulates apoptosis and cell migration, but not the JIP1-protected cytokine response, during Respiratory Syncytial Virus and Sendai Virus infection
Source: PubMed Central journal article supplement (PMC5727028; doi:10.1038/s41598-017-17689-0), 2017-12-12
Supplement: 41598_2017_17689_MOESM1_ESM.pdf [file 41598_2017_17689_MOESM1_ESM.pdf]

**DUSP1 regulates apoptosis and cell migration, but not the JIP1-protected cytokine response, during Respiratory Syncytial Virus and Sendai Virus infection.**

**Alexa C. Robitaille<sup>1,2</sup>, Elise Caron<sup>1</sup>, Nicolas Zucchini<sup>1,3</sup>, Espérance Mukawera<sup>1</sup>, Damien Adam<sup>1,4</sup>, Mélissa K. Mariani<sup>1</sup>, Anaïs Gélinas<sup>1,3</sup>, Audray Fortin<sup>1</sup>, Emmanuelle Brochiero<sup>1,4</sup> and Nathalie Grandvaux<sup>1, 2 \*</sup>**

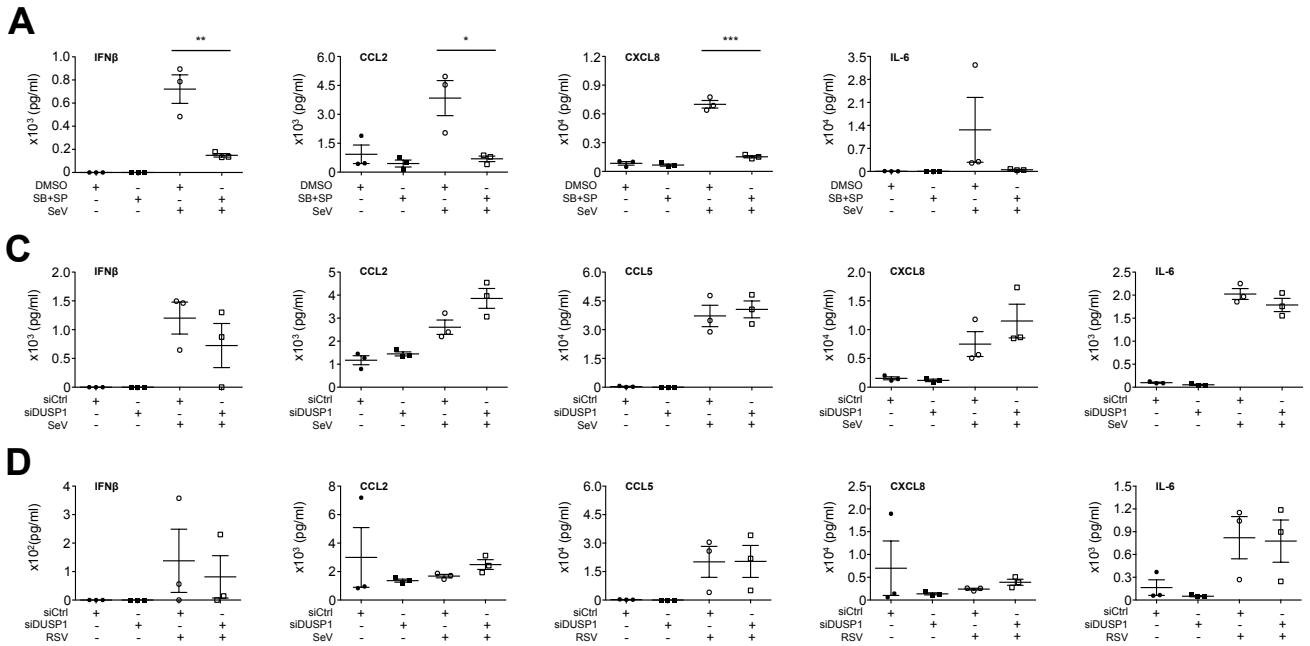

**Figure S1: Cytokine production elicited during SeV and RSV infection is protected from DUSP1-mediated inhibition of JNK and p38.**

A549 cells were either **(A)** pre-treated with DMSO (vehicle) or SB203580 (10  $\mu$ M) + SP600125 (10  $\mu$ M) for 30 min prior to infection, **(B)** transfected with empty or DUSP1-expressing plasmids or **(C and D)** transfected with Control (Ctrl) or DUSP1-specific siRNA before infection with SeV at 40 HAU/10<sup>6</sup> cells **(A to C)** or RSV at MOI of 3 **(D)**. Release of cytokines measured in each biological replicates was quantified using Luminex-based multiplex assays. Data are represented as mean +/- SEM of n $\geq$ 3 independent replicates and statistical analyzes were done using unpaired t-test. P<0.05 (\*), P<0.01 (\*\*) or P<0.001 (\*\*\*).

**B**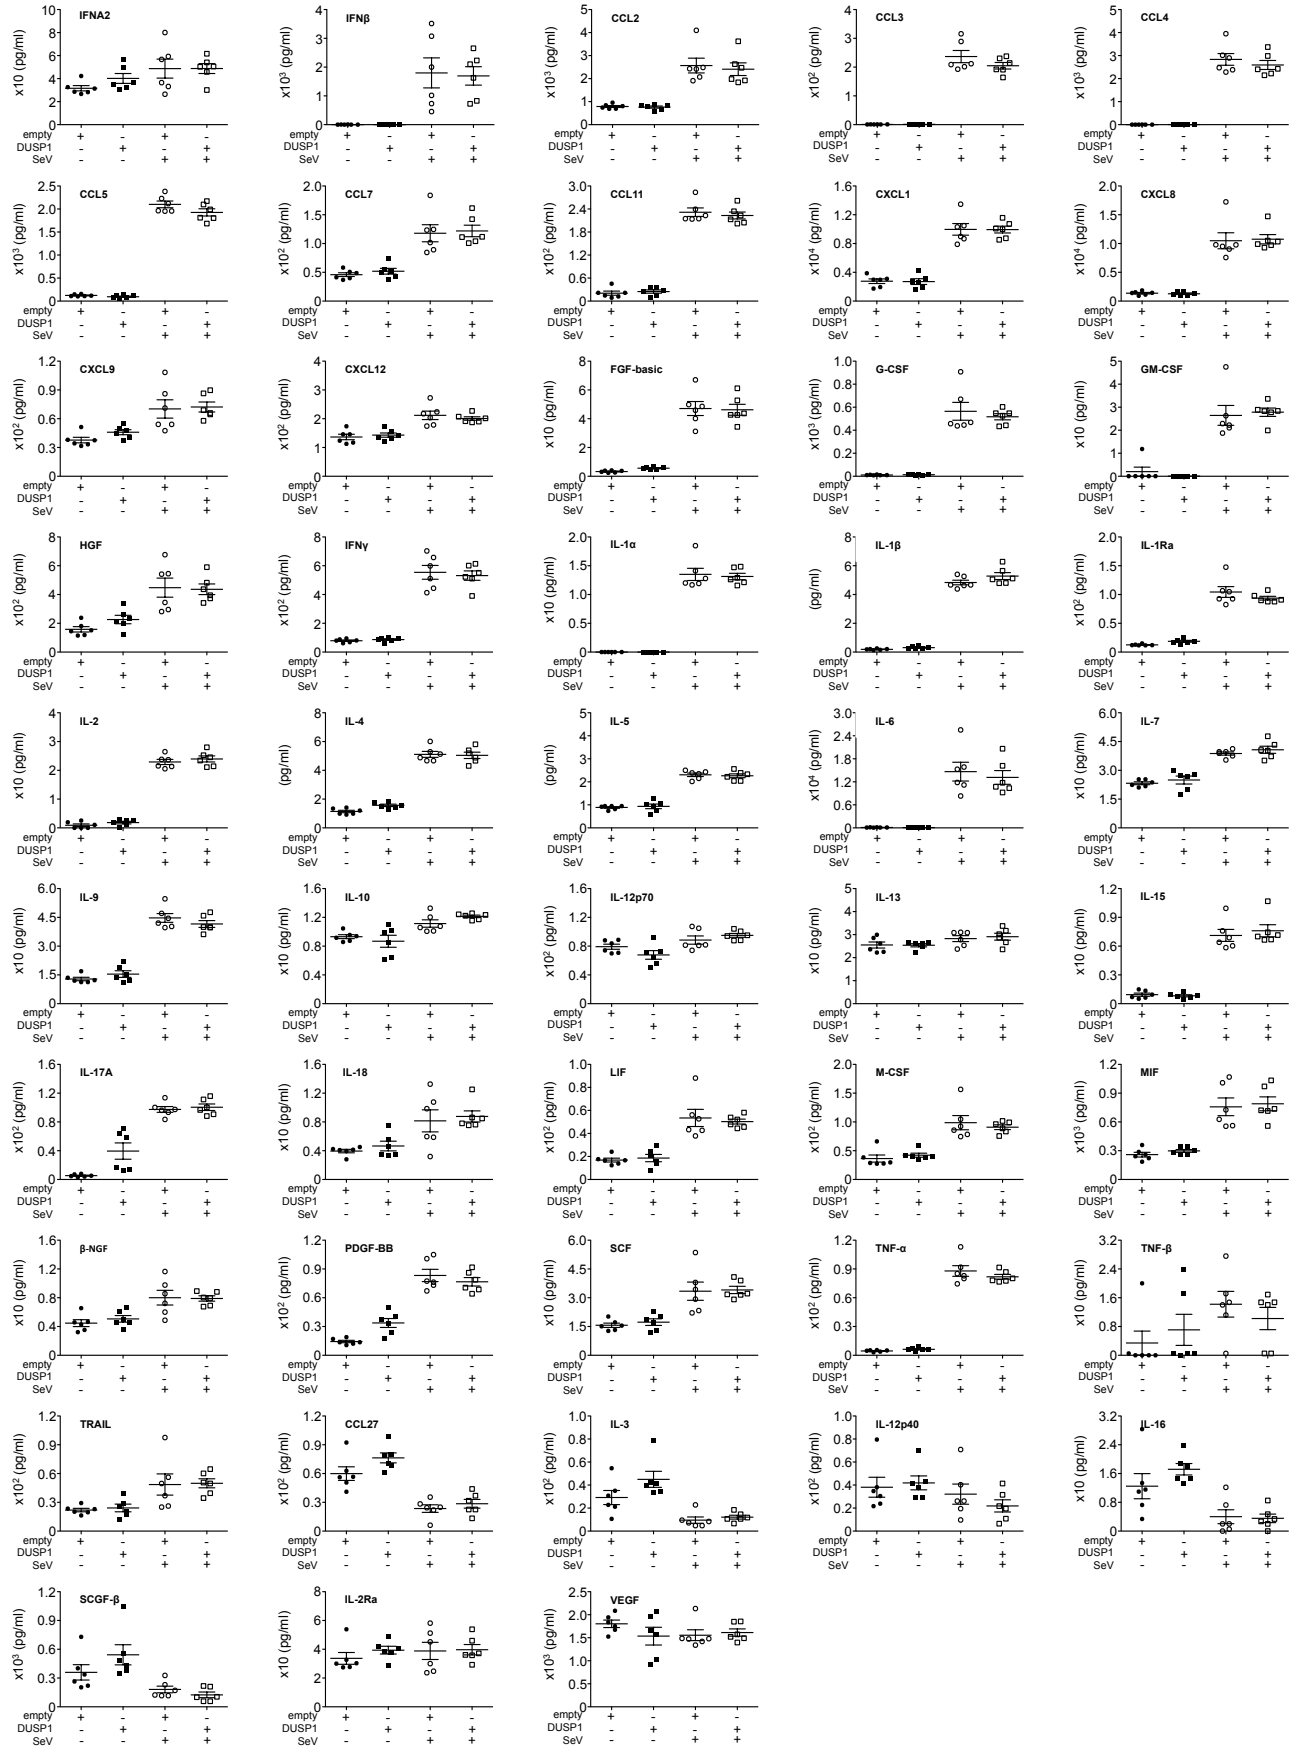

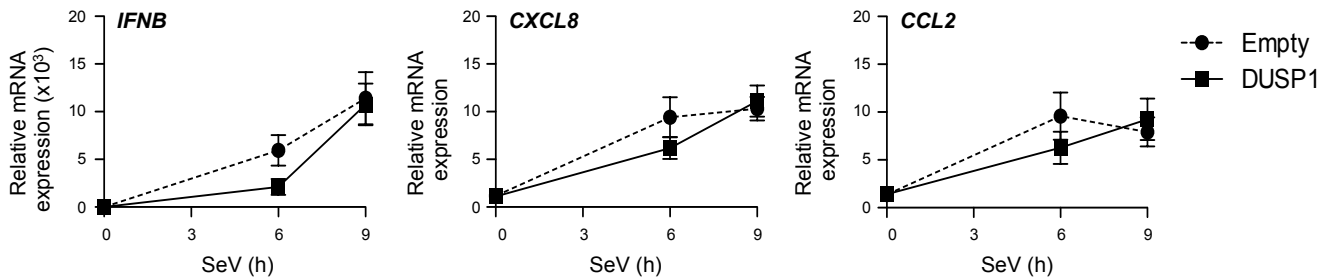

**Figure S2: DUSP1 expression does not alter cytokines mRNA levels induced by SeV infection.**

A549 cells were transfected with an empty- or DUSP1-expressing plasmid before infection with SeV at 5 HAU/10<sup>6</sup> cells for the indicated times. IFN $\beta$ , CXCL8 and CCL2 mRNA levels were quantified by qRT-PCR. Data are represented as mean  $\pm$  SEM of n=3 independent experiments and analyzed using two-way ANOVA with Bonferroni's post-test.



**Fig. 1A**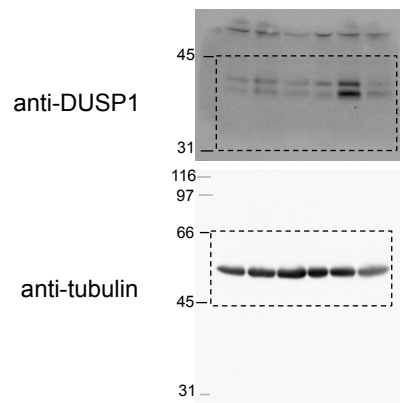**Fig. 1B**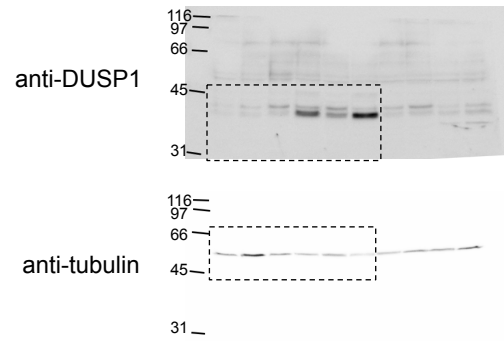**Figure S3: Full-length blots of Figure 1.**

**Fig. 2A**

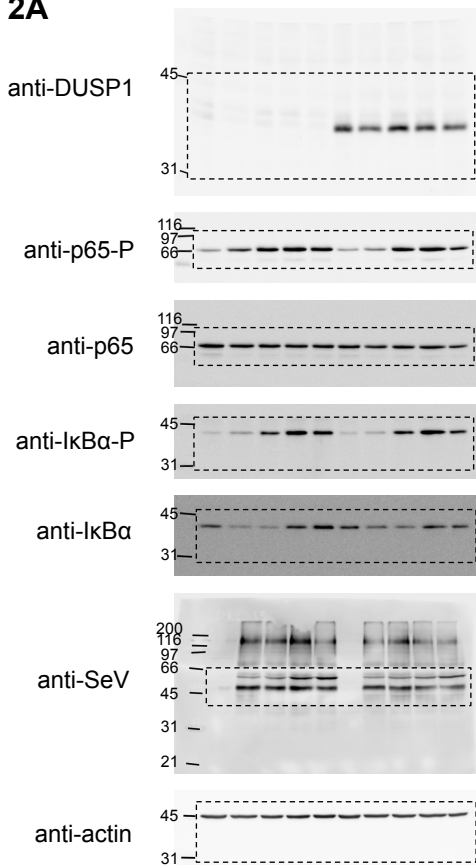

**Fig. 2B**

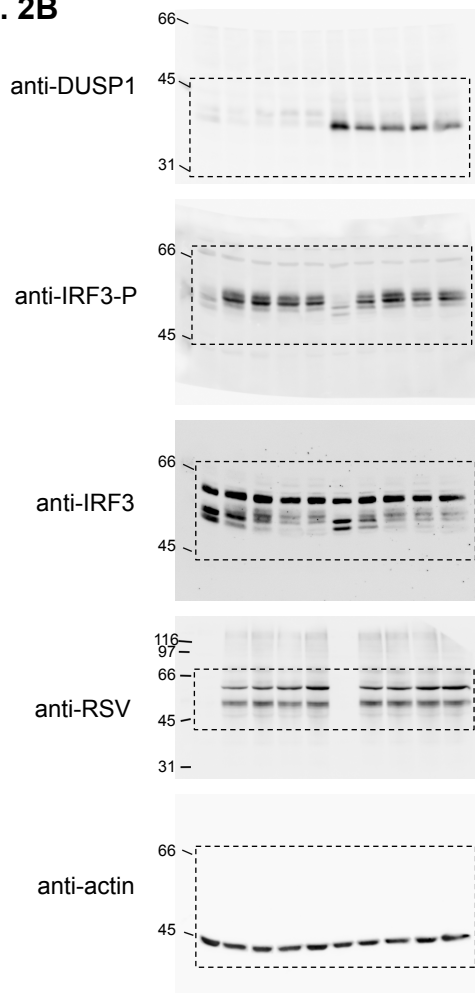

**Fig. 2C**

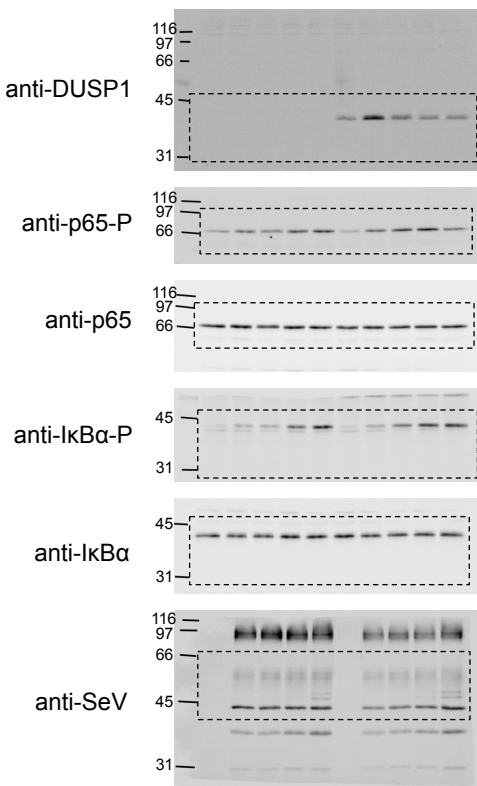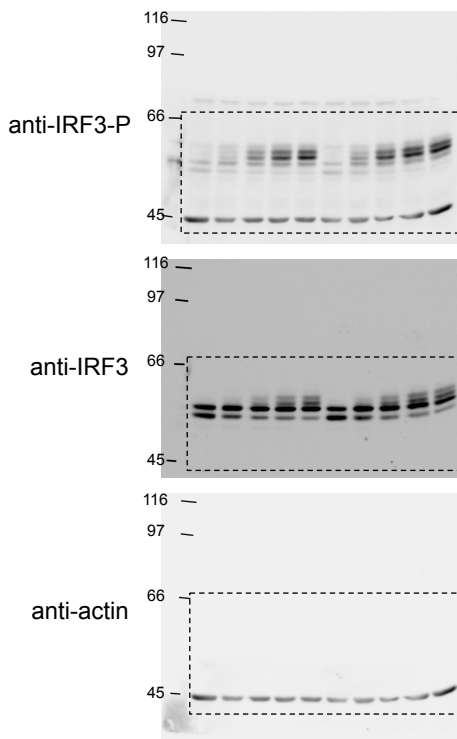

**Fig. 2D**

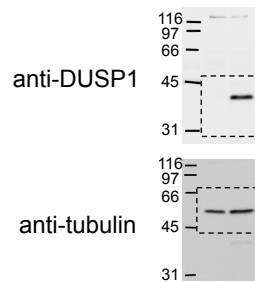

**Fig. 2E**

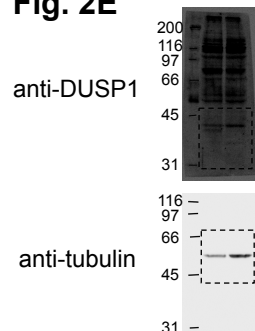

**Figure S4: Full-length blots of Figure 2.**

**Fig. 3A**

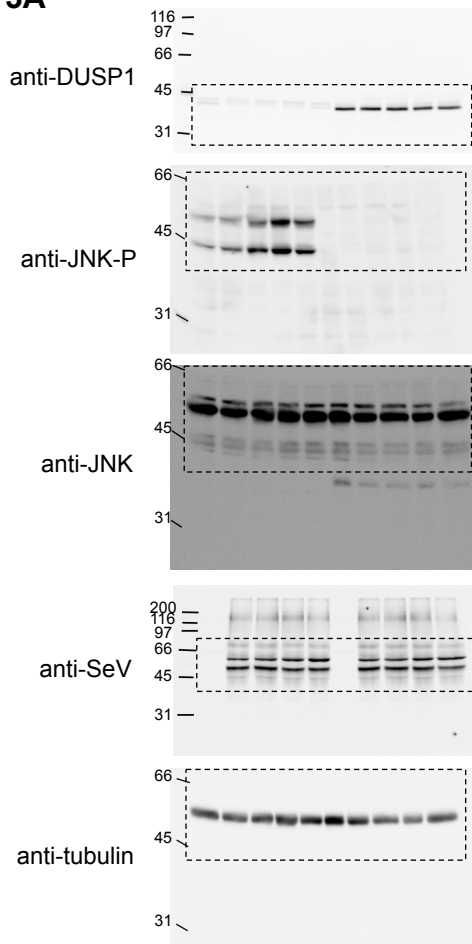

**Fig. 3C**

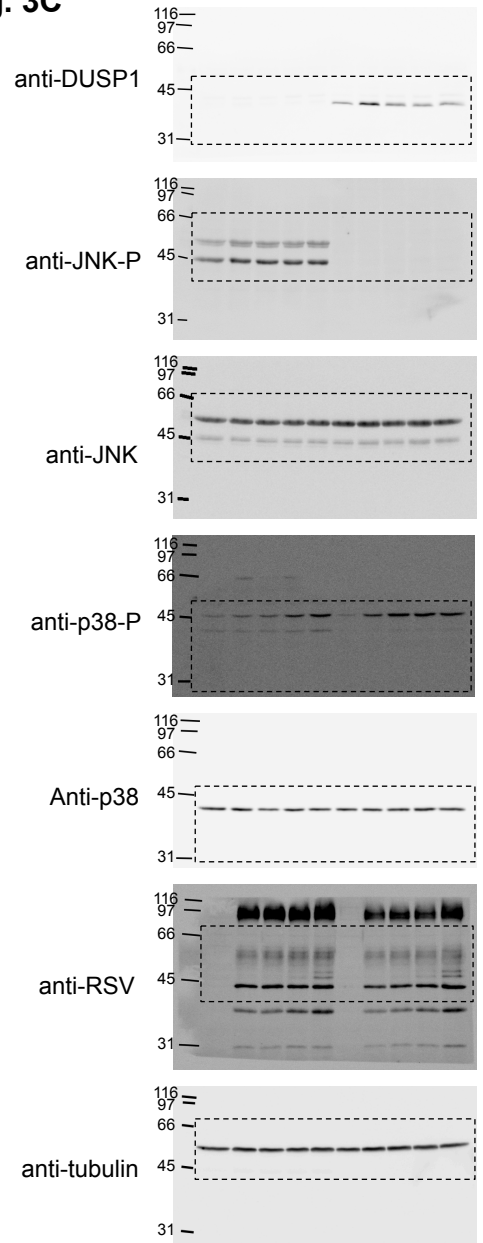

**Fig. 3B**

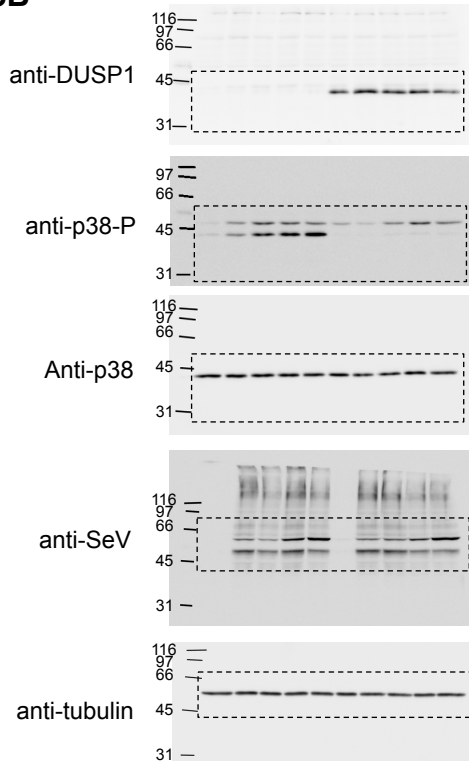

**Figure S5: Full-length blots of Figure 3.**

**Fig. 4A**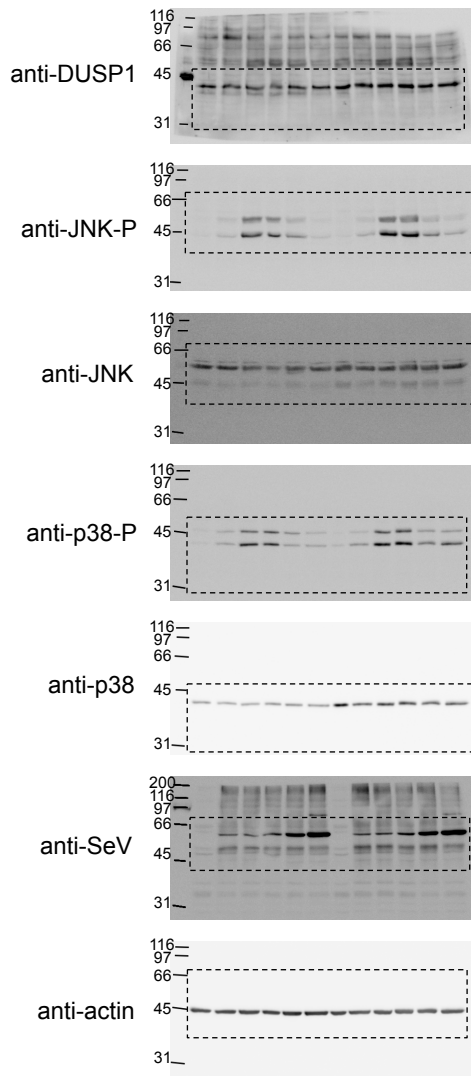**Fig. 4B**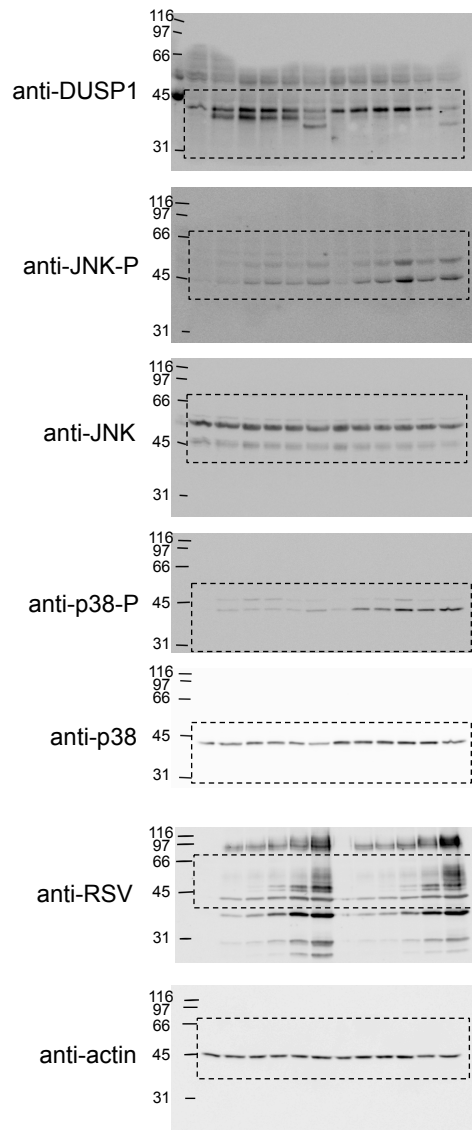**Figure S6 Full-length blots of Figure 4.**

**Fig. 5A**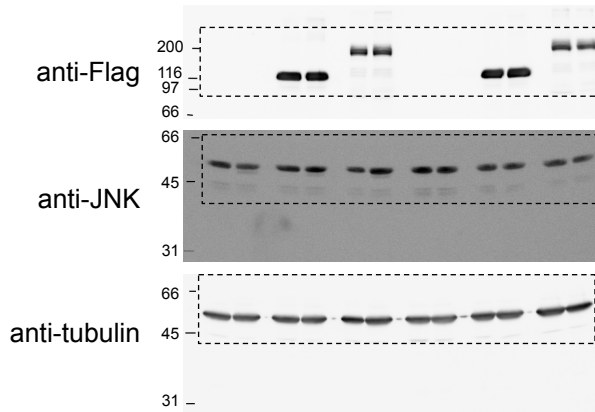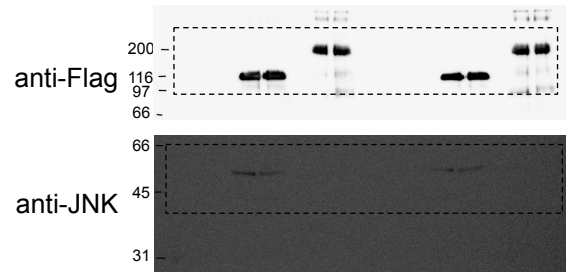**Fig. 5B**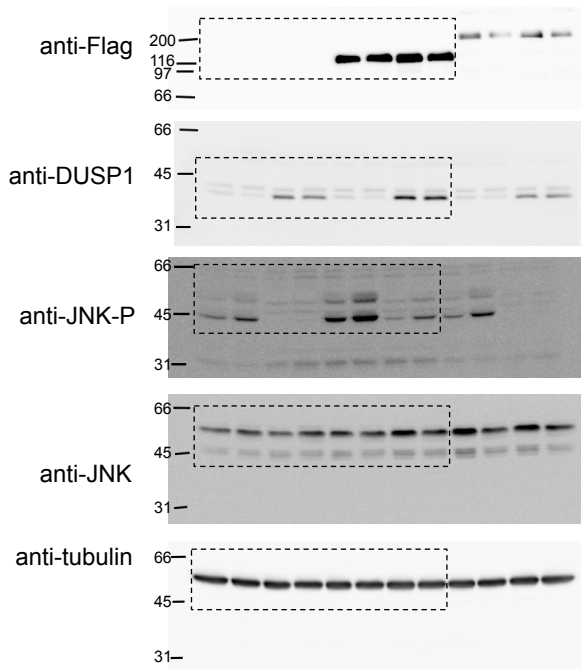**Fig. 5C**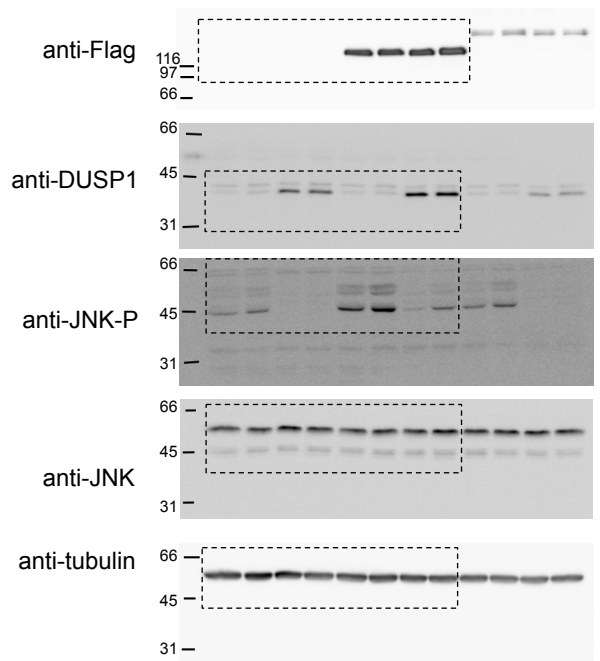**Figure S7: Full-length blots of Figure 5.**

**Fig. 6A**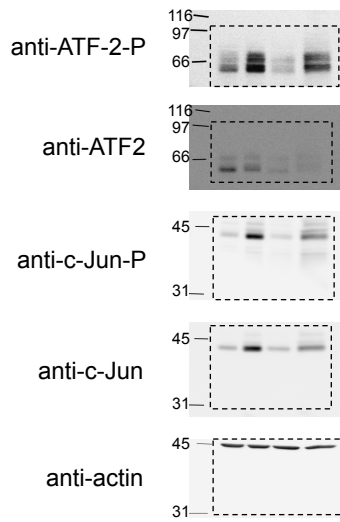**Fig. 6B**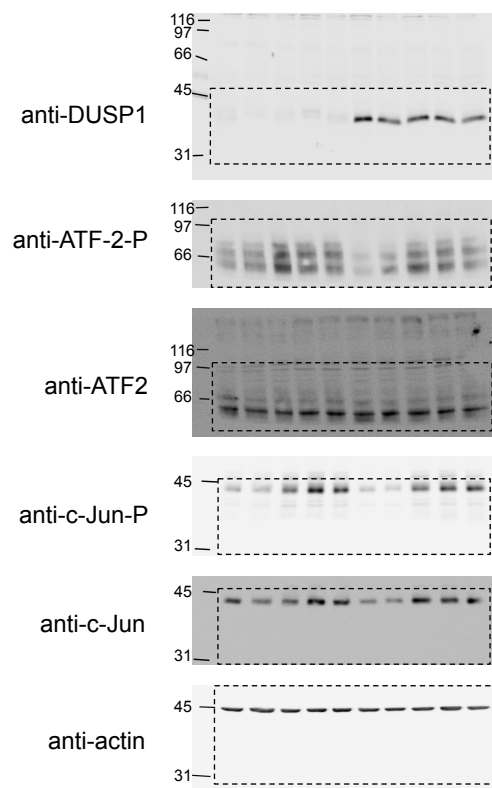**Fig. 6C**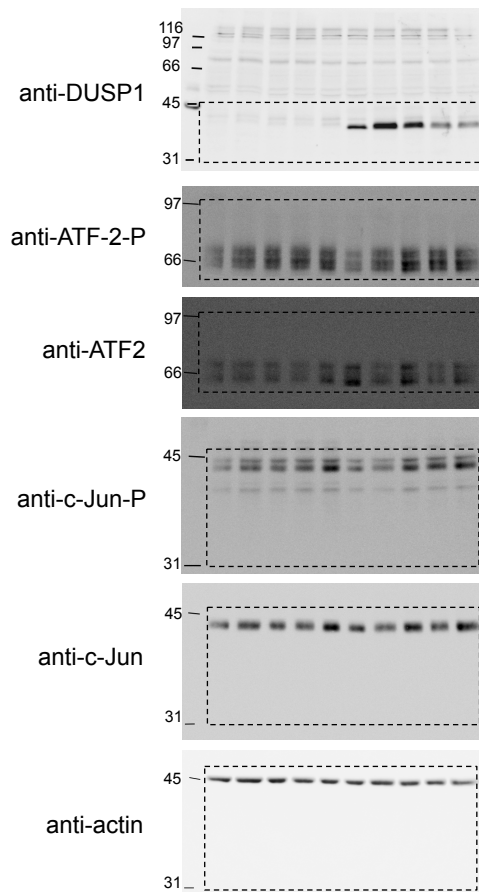**Figure S8: Full-length blots of Figure 6.**

**Fig. 7**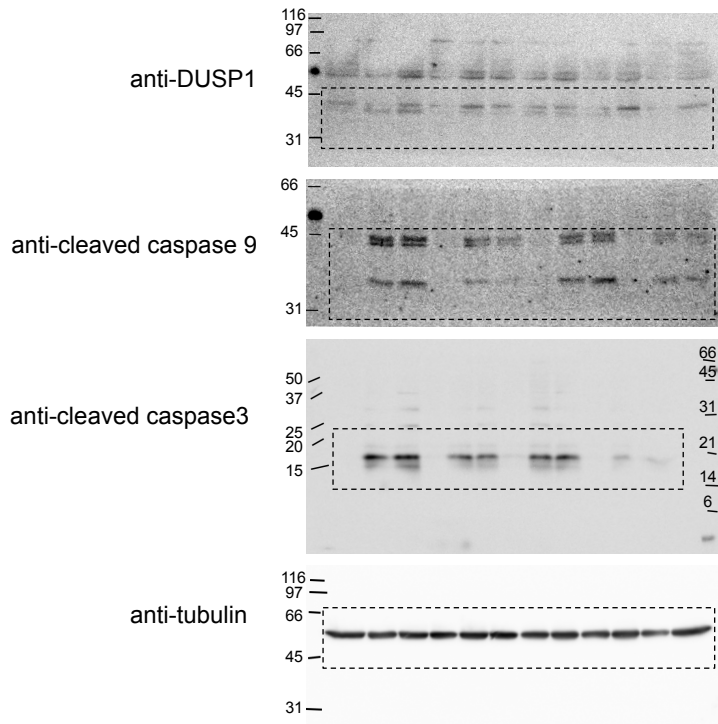**Figure S9: Full-length blots of Figure 7.**

## SUPPLEMENTARY INFORMATION

### MATERIALS AND METHODS

#### qRT-PCR

Specific mRNA levels were quantified by qRT-PCR as described in the Material and Methods using either Fast start SYBR Green Kit (Roche) for *IFNB* (S: gaacttgacatccctgaggagattaagcagc, AS: gttccttaggatttccactctgactatgggcc) and *IL8* (S: tctcttggcagccttctctgatttc, AS: gtgtggccactctcaatcactct) or using TaqMan Gene Expression Assays (Applied biosystems) for *CCL2* (#Hs00234140\_m1). Results were analyzed by the  $\Delta\Delta CT$  method after normalization to S9 mRNA levels (S: cgtctcgaccaagagctga, AS: ggtccttctcatcaagcgtc) or S9 (Hs02339424\_g1) for *CCL2*.
